# Supplementary material
Source: publisher figshare collection journal article supplement (https://frontiersin.figshare.com/ndownloader/files/23546723)

## Supplementary Material

### Supplementary S1. The results of FGA all tasks and total score

|                                                   | Baseline<br>Mean     | Post intervention<br>Mean | <i>p</i> | <i>Z</i> |
|---------------------------------------------------|----------------------|---------------------------|----------|----------|
| Gait on level surface; (SD)<br>Range              | 2.22 (0.67)<br>1/3   | 2.83 (0.39)<br>2/3        | 0.029    | -3.08    |
| Change in gait speed; (SD)<br>Range               | 2.33 (0.65)<br>1/3   | 2.83 (0.39)<br>2/3        | 0.030    | -2.12    |
| Gait with horizontal head turns,<br>(SD)<br>Range | 1.42 (0.67)<br>0/2   | 2.33 (0.49)<br>2/3        | <0.001*  | -2.12    |
| Gait with vertical head turns; (SD)<br>Range      | 1.50 (0.67)<br>0/2   | 2.67 (0.50)<br>2/3        | 0.041    | -2.64    |
| Gait with pivot turn; (SD)<br>Range               | 2.25 (0.75)<br>1/3   | 2.67 (0.65)<br>1/3        | 0.065    | -2.91    |
| Step over obstacle; (SD)<br>Range                 | 2.17 (0.94)<br>0/3   | 2.75 (0.45)<br>2/3        | 0.021    | -1.89    |
| Gait with narrow base of<br>support;(SD)<br>Range | 1.92 (1.08)<br>0/3   | 2.50 (0.52)<br>2/3        | 0.071    | -2.33    |
| Gait with eyes closed; (SD)<br>Range              | 1.17 (0.72)<br>0/2   | 2.08 (0.67)<br>1/3        | <0.001*  | -1.84    |
| Ambulating backward; (SD)<br>Range                | 2.00 (0.74)<br>1/3   | 2.83 (0.39)<br>2/3        | <0.001*  | -3.05    |
| Steps; (SD)<br>Range                              | 2.42 (0.52)<br>2/3   | 2.67 (0.49)<br>2/3        | 0.084    | -2.89    |
| Total; (SD)<br>Range                              | 19.58 (5.55)<br>8/26 | 26.17 (2.98)<br>18/29     | <0.001*  | -1.73    |

SD = standard deviation; Range = min/max; *Z*, *p*= Wilcoxon Signed Rank Test; \*Bonferroni correction  $p < 0.008$

**Supplementary S2:** The results of ETGUG all tasks and total score

|                                                           | Baseline<br>Mean | Post intervention<br>Mean | <i>p</i> | <i>Z</i> |
|-----------------------------------------------------------|------------------|---------------------------|----------|----------|
| Sit-to-stand; sec (SD)                                    | 1.95 (1.44)      | 1.32 (0.7)                | 0.59     | -2.67    |
| Range                                                     | 0.95/6.40        | 0.20/2.50                 |          |          |
| Gait initiation; sec (SD)                                 | 1.54 (1.31)      | 1.17 (1.1)                | 0.55     | -1.22    |
| Range                                                     | 0.65/5.40        | 0.50/4.20                 |          |          |
| Walk 1; sec (SD)                                          | 4.23 (1.41)      | 3.50 (1.18)               | 0.20     | -0.77    |
| Range                                                     | 2.60/7.30        | 1.30/4.50                 |          |          |
| Turn around; sec (SD)                                     | 3.73 (1.37)      | 3.58 (1.18)               | 0.85     | -1.57    |
| Range                                                     | 1.90/7.60        | 2.20/5.40                 |          |          |
| Walk 2; sec (SD)                                          | 4.80 (1.38)      | 3.49 (0.95)               | 0.03     | -0.16    |
| Range                                                     | 3.10/7.80        | 1.80/5.50                 |          |          |
| Slow down, stop,<br>turnaround,<br>and sit down; sec (SD) | 3.65 (1.31)      | 2.48 (1.04)               | <0.001*  | -2.24    |
| Range                                                     | 2.0/6.60         | 1.80/4.30                 |          |          |
| Total time; sec (SD)                                      | 19.95 (5.14)     | 15.61 (4.59)              | <0.001*  | -2.67    |
| Range, min/max                                            | 12.8 /31.00      | 7.30/22.20                |          |          |

SD = standard deviation; Range = min/max; Z, p= Wilcoxon Signed Rank Test; \*Bonferroni correction  $p < 0.005$

### Supplementary S3: DHI results

|                   | Baseline<br>Mean | Post intervention<br>Mean | <i>p</i> | <i>Z</i> |
|-------------------|------------------|---------------------------|----------|----------|
| Total points (SD) | 32.83 (23.76)    | 29.48 (26.95)             | 0.17     | -1.38    |
| Range             | 6/74             | 0/84                      |          |          |

SD = standard deviation; sec = seconds; *p* = Wilcoxon Signed Rank Test; \* = significant exact difference (one-tailed) (*p*<0.05); Range = min/max

**Supplementary S4:** Mean Scores of the Simulator Sickness Questionnaire after each exercise session

|              | Exercise Sessions |              |              |              |              |              |              |              |
|--------------|-------------------|--------------|--------------|--------------|--------------|--------------|--------------|--------------|
|              | 1                 | 2            | 3            | 4            | 5            | 6            | 7            | 8            |
| Mean<br>(SD) | 7.4<br>(5.7)      | 5.2<br>(4.9) | 6.0<br>(4.2) | 6.1<br>(5.4) | 4.8<br>(5.2) | 3.0<br>(3.9) | 4.8<br>(6.3) | 4.2<br>(3.6) |
| Range        | 1/18              | 0/15         | 0/14         | 0/16         | 0/15         | 0/13         | 0/11         | 0/13         |

Supplementary Figure S1a-h Game score of the exergames (units reflect points scored in the exergame)

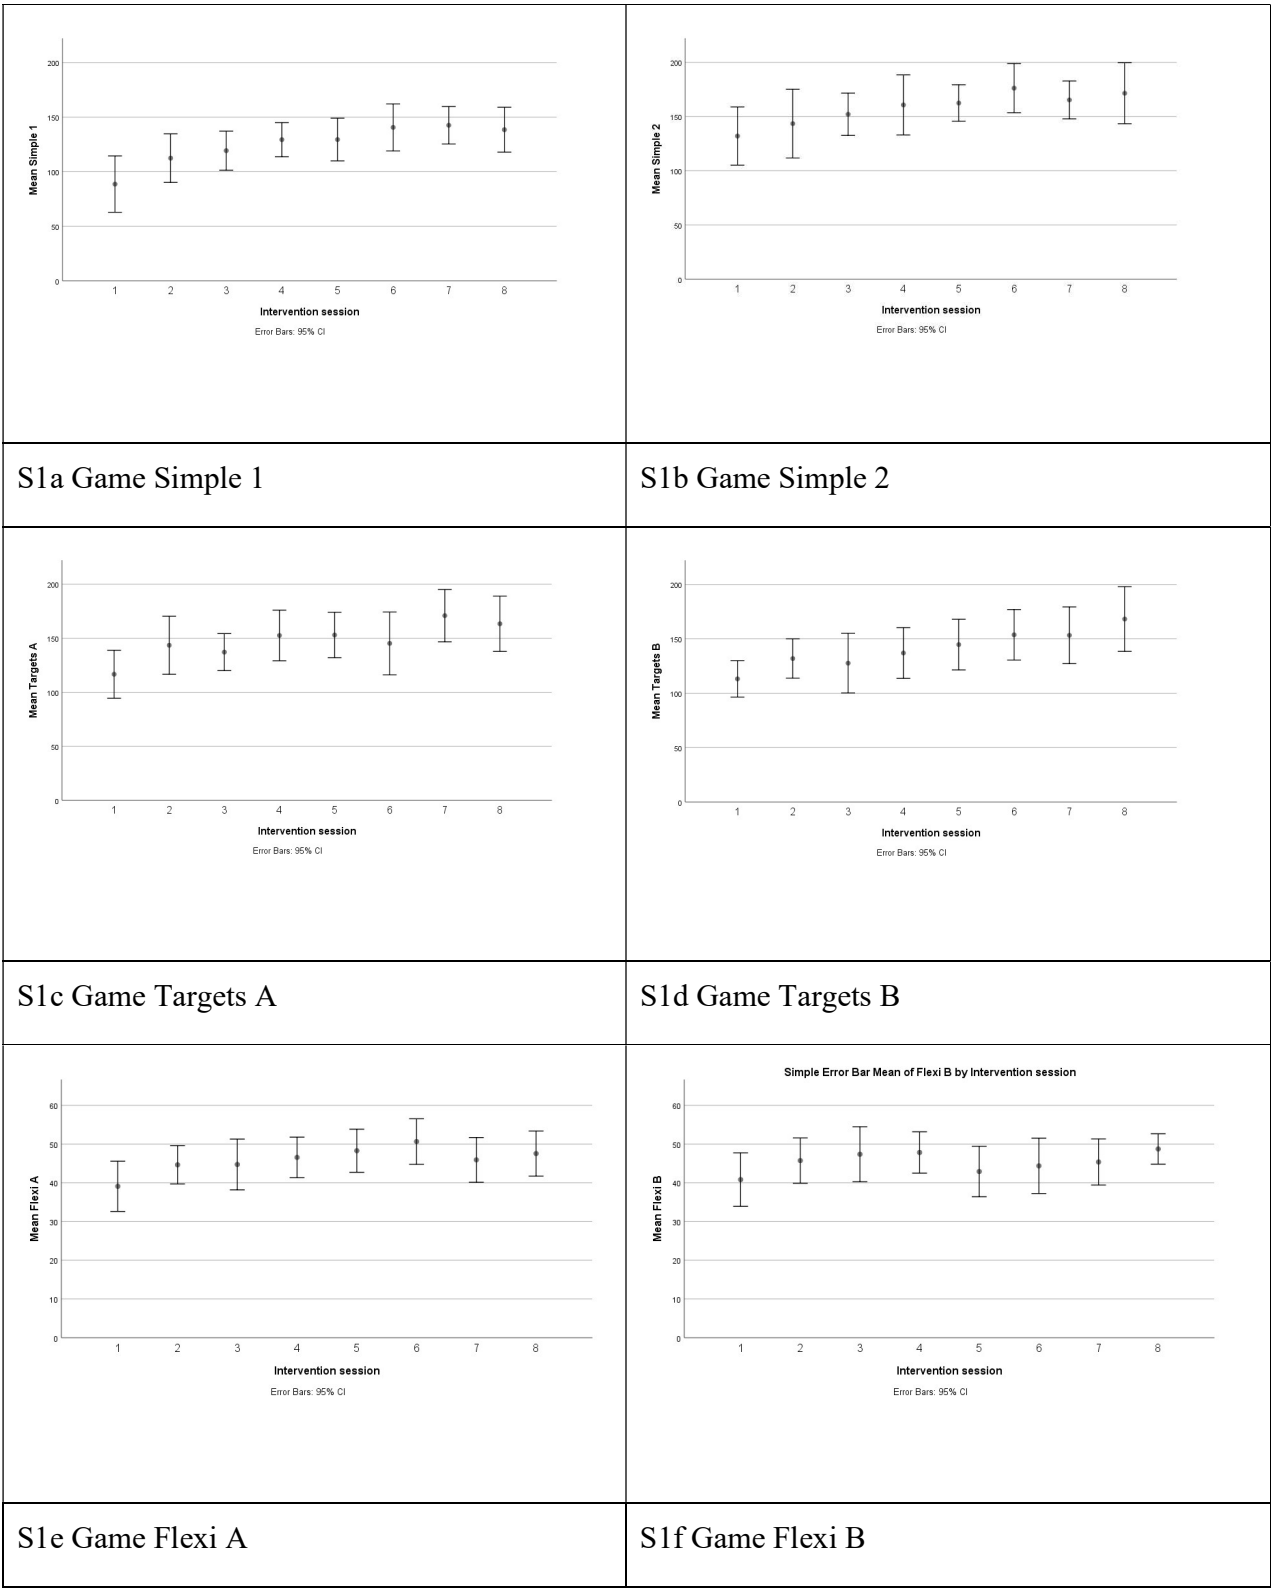

| 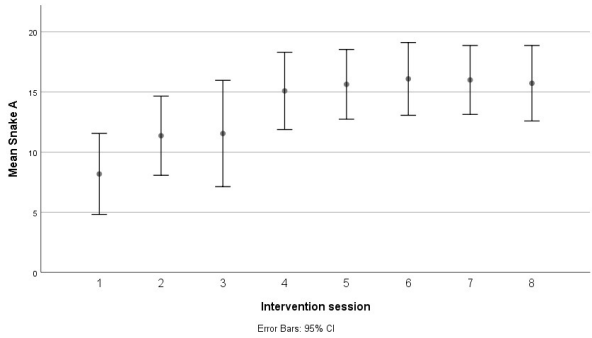 <p>Mean Snake A</p> <p>Intervention session</p> <p>Error Bars: 95% CI</p> <table border="1"><thead><tr><th>Intervention session</th><th>Mean Snake A</th></tr></thead><tbody><tr><td>1</td><td>8.5</td></tr><tr><td>2</td><td>11.5</td></tr><tr><td>3</td><td>11.5</td></tr><tr><td>4</td><td>15.5</td></tr><tr><td>5</td><td>16</td></tr><tr><td>6</td><td>16.5</td></tr><tr><td>7</td><td>16.5</td></tr><tr><td>8</td><td>16</td></tr></tbody></table> | Intervention session | Mean Snake A | 1 | 8.5 | 2 | 11.5 | 3 | 11.5 | 4 | 15.5 | 5 | 16 | 6 | 16.5 | 7 | 16.5 | 8 | 16 |  <p>Mean Snake B</p> <p>Intervention session</p> <p>Error Bars: 95% CI</p> <table border="1"><thead><tr><th>Intervention session</th><th>Mean Snake B</th></tr></thead><tbody><tr><td>1</td><td>9.5</td></tr><tr><td>2</td><td>10</td></tr><tr><td>3</td><td>12.5</td></tr><tr><td>4</td><td>13.5</td></tr><tr><td>5</td><td>14.5</td></tr><tr><td>6</td><td>14.5</td></tr><tr><td>7</td><td>15</td></tr><tr><td>8</td><td>14.5</td></tr></tbody></table> | Intervention session | Mean Snake B | 1 | 9.5 | 2 | 10 | 3 | 12.5 | 4 | 13.5 | 5 | 14.5 | 6 | 14.5 | 7 | 15 | 8 | 14.5 |
|--------------------------------------------------------------------------------------------------------------------------------------------------------------------------------------------------------------------------------------------------------------------------------------------------------------------------------------------------------------------------------------------------------------------------------------------------------------------------------------------------------------------------------------------|----------------------|--------------|---|-----|---|------|---|------|---|------|---|----|---|------|---|------|---|----|---------------------------------------------------------------------------------------------------------------------------------------------------------------------------------------------------------------------------------------------------------------------------------------------------------------------------------------------------------------------------------------------------------------------------------------------------------------------------------------------------------------------------------------------|----------------------|--------------|---|-----|---|----|---|------|---|------|---|------|---|------|---|----|---|------|
| Intervention session                                                                                                                                                                                                                                                                                                                                                                                                                                                                                                                       | Mean Snake A         |              |   |     |   |      |   |      |   |      |   |    |   |      |   |      |   |    |                                                                                                                                                                                                                                                                                                                                                                                                                                                                                                                                             |                      |              |   |     |   |    |   |      |   |      |   |      |   |      |   |    |   |      |
| 1                                                                                                                                                                                                                                                                                                                                                                                                                                                                                                                                          | 8.5                  |              |   |     |   |      |   |      |   |      |   |    |   |      |   |      |   |    |                                                                                                                                                                                                                                                                                                                                                                                                                                                                                                                                             |                      |              |   |     |   |    |   |      |   |      |   |      |   |      |   |    |   |      |
| 2                                                                                                                                                                                                                                                                                                                                                                                                                                                                                                                                          | 11.5                 |              |   |     |   |      |   |      |   |      |   |    |   |      |   |      |   |    |                                                                                                                                                                                                                                                                                                                                                                                                                                                                                                                                             |                      |              |   |     |   |    |   |      |   |      |   |      |   |      |   |    |   |      |
| 3                                                                                                                                                                                                                                                                                                                                                                                                                                                                                                                                          | 11.5                 |              |   |     |   |      |   |      |   |      |   |    |   |      |   |      |   |    |                                                                                                                                                                                                                                                                                                                                                                                                                                                                                                                                             |                      |              |   |     |   |    |   |      |   |      |   |      |   |      |   |    |   |      |
| 4                                                                                                                                                                                                                                                                                                                                                                                                                                                                                                                                          | 15.5                 |              |   |     |   |      |   |      |   |      |   |    |   |      |   |      |   |    |                                                                                                                                                                                                                                                                                                                                                                                                                                                                                                                                             |                      |              |   |     |   |    |   |      |   |      |   |      |   |      |   |    |   |      |
| 5                                                                                                                                                                                                                                                                                                                                                                                                                                                                                                                                          | 16                   |              |   |     |   |      |   |      |   |      |   |    |   |      |   |      |   |    |                                                                                                                                                                                                                                                                                                                                                                                                                                                                                                                                             |                      |              |   |     |   |    |   |      |   |      |   |      |   |      |   |    |   |      |
| 6                                                                                                                                                                                                                                                                                                                                                                                                                                                                                                                                          | 16.5                 |              |   |     |   |      |   |      |   |      |   |    |   |      |   |      |   |    |                                                                                                                                                                                                                                                                                                                                                                                                                                                                                                                                             |                      |              |   |     |   |    |   |      |   |      |   |      |   |      |   |    |   |      |
| 7                                                                                                                                                                                                                                                                                                                                                                                                                                                                                                                                          | 16.5                 |              |   |     |   |      |   |      |   |      |   |    |   |      |   |      |   |    |                                                                                                                                                                                                                                                                                                                                                                                                                                                                                                                                             |                      |              |   |     |   |    |   |      |   |      |   |      |   |      |   |    |   |      |
| 8                                                                                                                                                                                                                                                                                                                                                                                                                                                                                                                                          | 16                   |              |   |     |   |      |   |      |   |      |   |    |   |      |   |      |   |    |                                                                                                                                                                                                                                                                                                                                                                                                                                                                                                                                             |                      |              |   |     |   |    |   |      |   |      |   |      |   |      |   |    |   |      |
| Intervention session                                                                                                                                                                                                                                                                                                                                                                                                                                                                                                                       | Mean Snake B         |              |   |     |   |      |   |      |   |      |   |    |   |      |   |      |   |    |                                                                                                                                                                                                                                                                                                                                                                                                                                                                                                                                             |                      |              |   |     |   |    |   |      |   |      |   |      |   |      |   |    |   |      |
| 1                                                                                                                                                                                                                                                                                                                                                                                                                                                                                                                                          | 9.5                  |              |   |     |   |      |   |      |   |      |   |    |   |      |   |      |   |    |                                                                                                                                                                                                                                                                                                                                                                                                                                                                                                                                             |                      |              |   |     |   |    |   |      |   |      |   |      |   |      |   |    |   |      |
| 2                                                                                                                                                                                                                                                                                                                                                                                                                                                                                                                                          | 10                   |              |   |     |   |      |   |      |   |      |   |    |   |      |   |      |   |    |                                                                                                                                                                                                                                                                                                                                                                                                                                                                                                                                             |                      |              |   |     |   |    |   |      |   |      |   |      |   |      |   |    |   |      |
| 3                                                                                                                                                                                                                                                                                                                                                                                                                                                                                                                                          | 12.5                 |              |   |     |   |      |   |      |   |      |   |    |   |      |   |      |   |    |                                                                                                                                                                                                                                                                                                                                                                                                                                                                                                                                             |                      |              |   |     |   |    |   |      |   |      |   |      |   |      |   |    |   |      |
| 4                                                                                                                                                                                                                                                                                                                                                                                                                                                                                                                                          | 13.5                 |              |   |     |   |      |   |      |   |      |   |    |   |      |   |      |   |    |                                                                                                                                                                                                                                                                                                                                                                                                                                                                                                                                             |                      |              |   |     |   |    |   |      |   |      |   |      |   |      |   |    |   |      |
| 5                                                                                                                                                                                                                                                                                                                                                                                                                                                                                                                                          | 14.5                 |              |   |     |   |      |   |      |   |      |   |    |   |      |   |      |   |    |                                                                                                                                                                                                                                                                                                                                                                                                                                                                                                                                             |                      |              |   |     |   |    |   |      |   |      |   |      |   |      |   |    |   |      |
| 6                                                                                                                                                                                                                                                                                                                                                                                                                                                                                                                                          | 14.5                 |              |   |     |   |      |   |      |   |      |   |    |   |      |   |      |   |    |                                                                                                                                                                                                                                                                                                                                                                                                                                                                                                                                             |                      |              |   |     |   |    |   |      |   |      |   |      |   |      |   |    |   |      |
| 7                                                                                                                                                                                                                                                                                                                                                                                                                                                                                                                                          | 15                   |              |   |     |   |      |   |      |   |      |   |    |   |      |   |      |   |    |                                                                                                                                                                                                                                                                                                                                                                                                                                                                                                                                             |                      |              |   |     |   |    |   |      |   |      |   |      |   |      |   |    |   |      |
| 8                                                                                                                                                                                                                                                                                                                                                                                                                                                                                                                                          | 14.5                 |              |   |     |   |      |   |      |   |      |   |    |   |      |   |      |   |    |                                                                                                                                                                                                                                                                                                                                                                                                                                                                                                                                             |                      |              |   |     |   |    |   |      |   |      |   |      |   |      |   |    |   |      |
| S1g Game Snake A                                                                                                                                                                                                                                                                                                                                                                                                                                                                                                                           | S1g Game Snake A     |              |   |     |   |      |   |      |   |      |   |    |   |      |   |      |   |    |                                                                                                                                                                                                                                                                                                                                                                                                                                                                                                                                             |                      |              |   |     |   |    |   |      |   |      |   |      |   |      |   |    |   |      |

**Figure S2 a-d**

**Figure 2a** The game Simple trains focussed attention – the ability to concentrate on certain stimuli and react as quick as possible to them

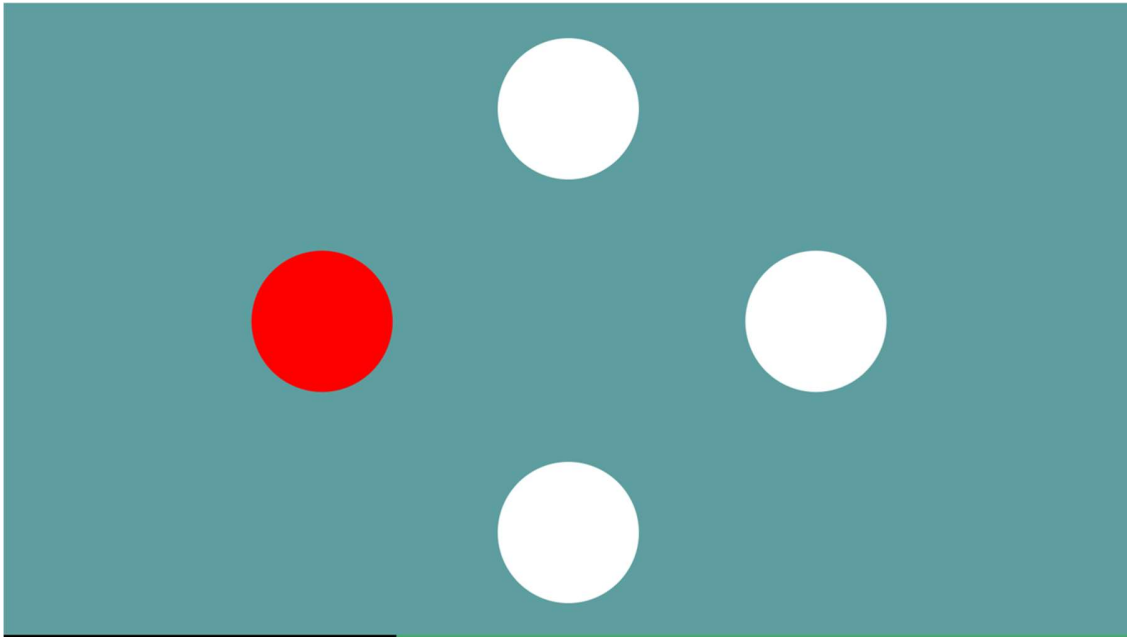

**Figure 2b** The game Targets which helps training reaction time (speed & accuracy)

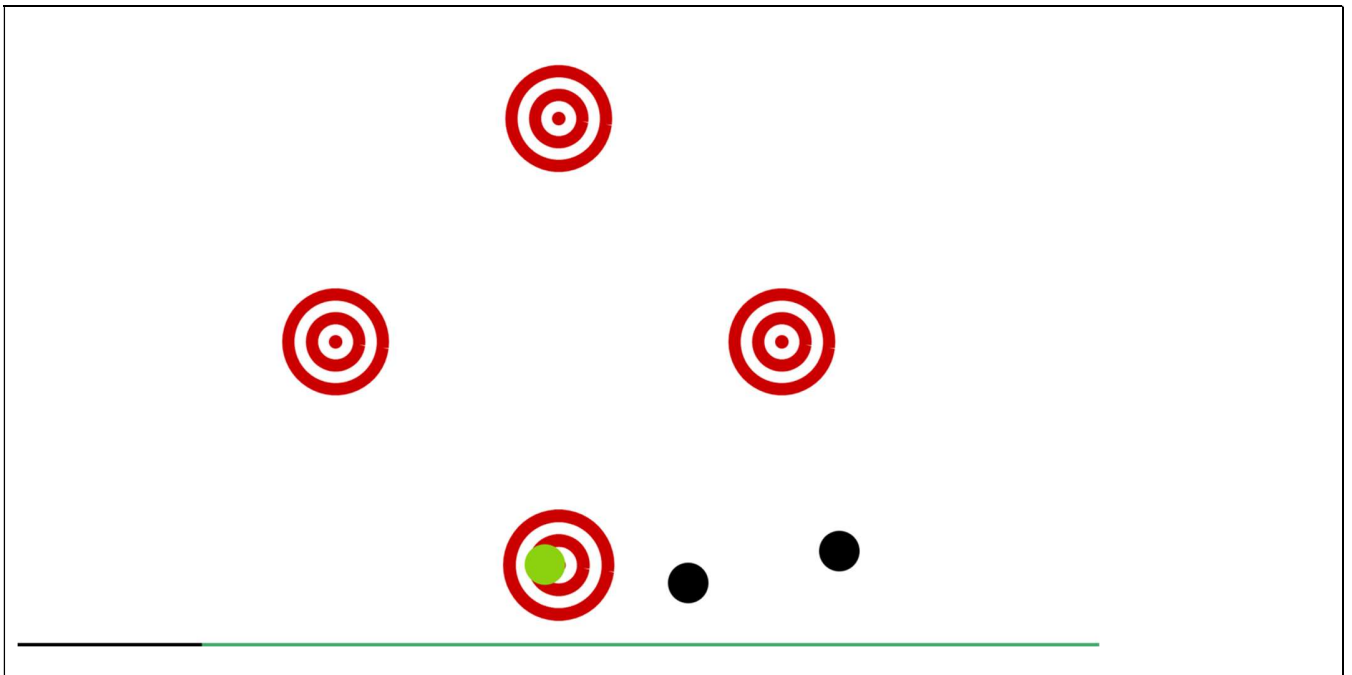

**Figure 2c** Flexi supports training of shifting attention

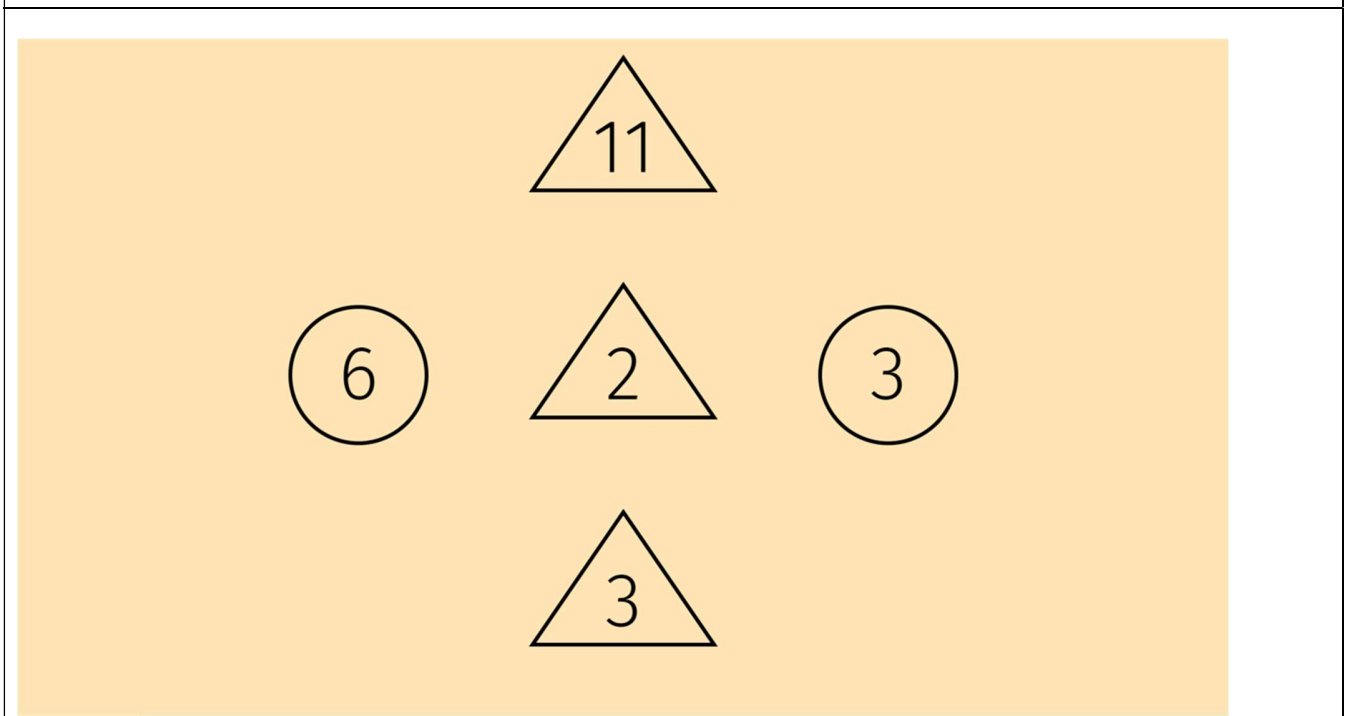

**Figure 2d** The Snake game which supports training of spatial orientation in a 2D virtual environment

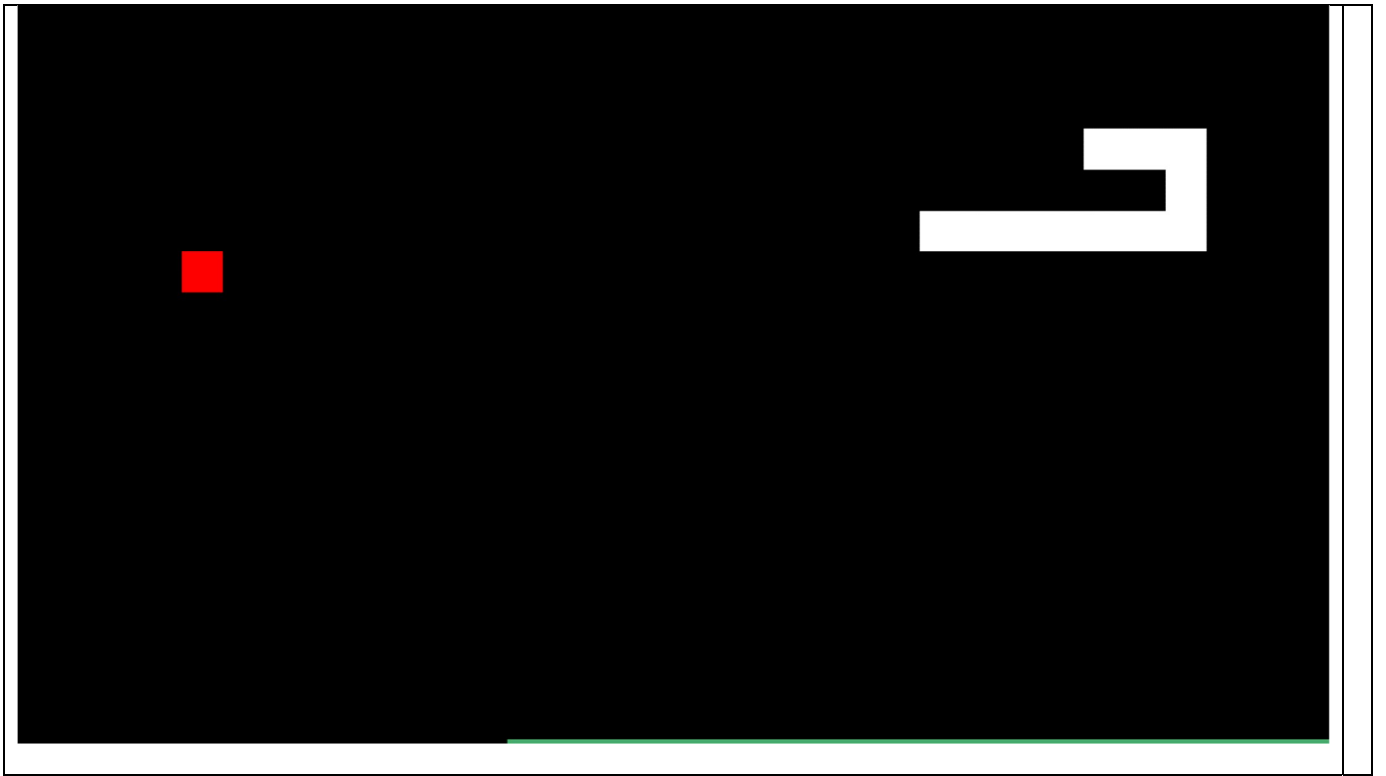

Supplement: Supplementary file [file 23546723]
